# Supplementary material
Source: MDPI journal article supplement (https://www.mdpi.com/2624-599X/5/1/13)
Supplement: s1 [file s1]

**Table S1.** The Acoustic and Subjective Analysis of the Investigation Protocol was implemented in the nine case study schools.

| Investigated scenario                                                                                                                 |                                                                                                                                        | Investigation Protocol                                                                                                                                                                                                                                |                                                                           |                                                                                                                |                                                          |
|---------------------------------------------------------------------------------------------------------------------------------------|----------------------------------------------------------------------------------------------------------------------------------------|-------------------------------------------------------------------------------------------------------------------------------------------------------------------------------------------------------------------------------------------------------|---------------------------------------------------------------------------|----------------------------------------------------------------------------------------------------------------|----------------------------------------------------------|
| School<br>(K=Kinder-<br>garten,<br>P=Primary<br>school, S=<br>Secondary<br>school)<br>/ City<br>(F=Florence,<br>P=Perugia,<br>R=Rome) | (S1=Class-<br>room,<br>S2=Labora-<br>tory, S3=<br>Auditorium,<br>S4=Gym,<br>S5=Com-<br>mon area,<br>S6=Canteen,<br>S7=Outdoor<br>area) | Acoustic Measure-<br>ments in Unoccu-<br>pied Environments<br>(Parameters)                                                                                                                                                                            | Acoustic Measure-<br>ments in Occupied<br>Environments (In-<br>formation) | Subjective<br>Investigation Q1,<br>Q2, Q3<br>(×= no question-<br>naires,<br>✓= administered<br>questionnaires) | Vocal Effort<br>(Teacher code: Sub-<br>ject of teaching) |
| K/F                                                                                                                                   | S1                                                                                                                                     | RT, C <sub>50</sub> , D <sub>nT,w</sub> (wall between the room and the corridor, wall between the room and adjacent class-room, floor between the room and the room below), L <sub>amb</sub> , L <sub>Aeq</sub> out of the room                       | Parameter: L <sub>Aeq</sub><br>N. of students: 18                         | Q1: n/a <sup>2</sup><br>Q3: ✓                                                                                  | FI1: -<br>FI3: -<br>FI4: -<br>FI5: -                     |
|                                                                                                                                       | S2                                                                                                                                     | RT, C <sub>50</sub> , D <sub>nT,w</sub> (wall between the room and the corridor, wall between the room and adjacent class-room, floor between the room and the room below), L <sub>IC,int</sub> , L <sub>amb</sub> , L <sub>Aeq</sub> out of the room | Parameter: L <sub>Aeq</sub><br>N. of students: 6                          | Q2: n/a <sup>2</sup><br>Q3: ✓                                                                                  |                                                          |
|                                                                                                                                       | S3                                                                                                                                     | RT, STI, D <sub>nT,w</sub> (floor between the room and the room above), L <sub>IC,int</sub> , L' <sub>n</sub> (floor between the room and the room above)                                                                                             | n/a <sup>1</sup>                                                          | Q2: n/a <sup>2</sup><br>Q3: ✓                                                                                  |                                                          |
|                                                                                                                                       | S4                                                                                                                                     | RT, L <sub>amb</sub>                                                                                                                                                                                                                                  | Parameter: L <sub>Aeq</sub><br>N. of students: 11                         | Q2: n/a <sup>2</sup><br>Q3: ✓                                                                                  |                                                          |
|                                                                                                                                       | S5                                                                                                                                     | RT, L <sub>amb</sub>                                                                                                                                                                                                                                  | Parameter: L <sub>Aeq</sub><br>N. of students: 14                         | Q2: n/a <sup>2</sup>                                                                                           |                                                          |
|                                                                                                                                       | S6                                                                                                                                     | RT                                                                                                                                                                                                                                                    | Parameter: L <sub>Aeq</sub><br>N. of students: 40                         | Q2: n/a <sup>2</sup>                                                                                           |                                                          |
|                                                                                                                                       | S7                                                                                                                                     | Outdoor L <sub>Aeq</sub>                                                                                                                                                                                                                              | n/a <sup>3</sup>                                                          | Q2: n/a <sup>2</sup><br>Q3: ✓                                                                                  |                                                          |
| K/P                                                                                                                                   | S1                                                                                                                                     | RT, C <sub>50</sub> , STI, D <sub>2m,nT,w</sub> , D <sub>nT,w</sub> (wall between the room and the corridor, wall between the room and adjacent classroom), L <sub>amb</sub> , L <sub>Aeq</sub> out of the room                                       | Parameter: L <sub>Aeq</sub><br>N. of students: 17                         | Q1: n/a <sup>2</sup><br>Q3: ✓                                                                                  | PI1: -<br>PI2: -<br>PI3: -<br>PI4: -                     |
|                                                                                                                                       | S2                                                                                                                                     | RT, C <sub>50</sub> , STI, D <sub>2m,nT,w</sub> , L <sub>amb</sub> , L <sub>Aeq</sub> out of the room                                                                                                                                                 | Parameter: L <sub>Aeq</sub><br>N. of students: 17                         | Q2: n/a <sup>2</sup><br>Q3: ✓                                                                                  |                                                          |
|                                                                                                                                       | S3                                                                                                                                     | n/a <sup>1</sup>                                                                                                                                                                                                                                      | n/a <sup>1</sup>                                                          | Q2: n/a <sup>2</sup><br>Q3: ✓                                                                                  |                                                          |
|                                                                                                                                       | S4                                                                                                                                     | n/a <sup>1</sup>                                                                                                                                                                                                                                      | n/a <sup>1</sup>                                                          | Q2: n/a <sup>2</sup><br>Q3: ✓                                                                                  |                                                          |

| School<br>(K=Kindergarten,<br>P=Primary school,<br>S=Secondary school)<br>/ City<br>(F=Florence,<br>P=Perugia,<br>R=Rome) | Investigated scenario                                                                                               | Investigation Protocol                                                                                                                                                                                                                                                       |                                                              |                                                                                                  |                                                         |
|---------------------------------------------------------------------------------------------------------------------------|---------------------------------------------------------------------------------------------------------------------|------------------------------------------------------------------------------------------------------------------------------------------------------------------------------------------------------------------------------------------------------------------------------|--------------------------------------------------------------|--------------------------------------------------------------------------------------------------|---------------------------------------------------------|
|                                                                                                                           | (S1=Classroom,<br>S2=Laboratory,<br>S3=Auditorium,<br>S4=Gym,<br>S5=Common area,<br>S6=Canteen,<br>S7=Outdoor area) | Acoustic Measurements in Unoccupied Environments (Parameters)                                                                                                                                                                                                                | Acoustic Measurements in Occupied Environments (Information) | Subjective Investigation Q1, Q2, Q3<br>(×= no questionnaires,<br>✓= administered questionnaires) | Vocal Effort<br>(Teacher code: Subject of teaching)     |
| K/R                                                                                                                       | S5                                                                                                                  | RT, $L_{amb}$                                                                                                                                                                                                                                                                | Parameter: $L_{Aeq}$<br>N. of students: 18                   | Q2: $n/a^2$                                                                                      |                                                         |
|                                                                                                                           | S6                                                                                                                  | RT, $D_{2m,nT,w}$ , $L_{amb}$                                                                                                                                                                                                                                                | Parameter: $L_{Aeq}$<br>N. of students: 30                   | Q2: $n/a^2$                                                                                      |                                                         |
|                                                                                                                           | S7                                                                                                                  | Outdoor $L_{Aeq}$                                                                                                                                                                                                                                                            | $n/a^3$                                                      | Q2: $n/a^2$<br>Q3: ✓                                                                             |                                                         |
|                                                                                                                           | S1                                                                                                                  | RT, $C_{50}$ , $D_{2m,nT,w}$ , $D_{nT,w}$ (wall between the room and the corridor, wall between the room and adjacent classroom, floor between the room and the room below), $L'_{nT}$ (floor between the room and the room above), $L_{IC,int}$ , $L_{Aeq}$ out of the room | $n/a^1$                                                      | Q1: $n/a^2$<br>Q3: ×                                                                             |                                                         |
|                                                                                                                           | S2                                                                                                                  | RT, $C_{50}$ , $D_{2m,nT,w}$ , $D_{nT,w}$ (wall between the room and the corridor, wall between the room and adjacent classroom), $L_{ID}$ , $L_{IC,int}$ , $L_{amb}$ , $L_{Aeq}$ out of the room                                                                            | $n/a^1$                                                      | Q2: $n/a^2$<br>Q3: ×                                                                             |                                                         |
|                                                                                                                           | S3                                                                                                                  | $n/a^1$                                                                                                                                                                                                                                                                      | $n/a^1$                                                      | Q2: $n/a^2$<br>Q3: ×                                                                             |                                                         |
|                                                                                                                           | S4                                                                                                                  | RT, $L_{IC,int}$                                                                                                                                                                                                                                                             | $n/a^1$                                                      | Q2: $n/a^2$<br>Q3: ×                                                                             |                                                         |
|                                                                                                                           | S5                                                                                                                  | RT                                                                                                                                                                                                                                                                           | $n/a^1$                                                      | Q2: $n/a^2$                                                                                      |                                                         |
|                                                                                                                           | S6                                                                                                                  | RT                                                                                                                                                                                                                                                                           | $n/a^1$                                                      | Q2: $n/a^2$                                                                                      |                                                         |
|                                                                                                                           | S7                                                                                                                  | Outdoor $L_{Aeq}$                                                                                                                                                                                                                                                            | $n/a^3$                                                      | Q2: $n/a^2$<br>Q3: ×                                                                             |                                                         |
|                                                                                                                           | S1                                                                                                                  | RT, $C_{50}$ , $D_{2m,nT,w}$ , $D_{nT,w}$ (wall between the room and the corridor, wall between the room and adjacent classroom), $L'_{nT}$ (floor between the room and the room above), $L_{IC,int}$ , $L_{amb}$                                                            | Parameter: $L_{Aeq}$<br>N. of students: 24                   | Q1: ✓<br>Q3: ✓                                                                                   | FPI1: Italian<br>FPM1: Mathematics<br>FPM2: Mathematics |
|                                                                                                                           | S2                                                                                                                  | RT, $C_{50}$ , $D_{nT,w}$ (floor between the room and the room above, floor between the room and the room below),                                                                                                                                                            | Parameter: $L_{Aeq}$<br>N. of students: 20                   | Q2: ✓<br>Q3: ✓                                                                                   |                                                         |
|                                                                                                                           |                                                                                                                     |                                                                                                                                                                                                                                                                              |                                                              |                                                                                                  |                                                         |
|                                                                                                                           |                                                                                                                     |                                                                                                                                                                                                                                                                              |                                                              |                                                                                                  |                                                         |
| P/F                                                                                                                       |                                                                                                                     |                                                                                                                                                                                                                                                                              |                                                              |                                                                                                  |                                                         |

| School<br>(K=Kindergarten,<br>P=Primary school,<br>S=Secondary school)<br>/ City<br>(F=Florence,<br>P=Perugia,<br>R=Rome) | Investigated scenario                                                                                               | Investigation Protocol                                                                                                                                                                                                                                                                           |                                                              |                                                                                                  |                                                      |
|---------------------------------------------------------------------------------------------------------------------------|---------------------------------------------------------------------------------------------------------------------|--------------------------------------------------------------------------------------------------------------------------------------------------------------------------------------------------------------------------------------------------------------------------------------------------|--------------------------------------------------------------|--------------------------------------------------------------------------------------------------|------------------------------------------------------|
|                                                                                                                           | (S1=Classroom,<br>S2=Laboratory,<br>S3=Auditorium,<br>S4=Gym,<br>S5=Common area,<br>S6=Canteen,<br>S7=Outdoor area) | Acoustic Measurements in Unoccupied Environments<br>(Parameters)                                                                                                                                                                                                                                 | Acoustic Measurements in Occupied Environments (Information) | Subjective Investigation Q1, Q2, Q3<br>(×= no questionnaires,<br>✓= administered questionnaires) | Vocal Effort<br>(Teacher code: Subject of teaching)  |
| P/P                                                                                                                       |                                                                                                                     | L <sub>C,int</sub> , L <sub>Aeq</sub> out of the room                                                                                                                                                                                                                                            |                                                              |                                                                                                  |                                                      |
|                                                                                                                           | S3                                                                                                                  | RT, STI, D <sub>nT,w</sub> (floor between the room and the room above), L <sub>C,int</sub> , L' <sub>n</sub> (floor between the room and the room above)                                                                                                                                         | n/a <sup>1</sup>                                             | Q2: ✓<br>Q3: ✓                                                                                   |                                                      |
|                                                                                                                           | S4                                                                                                                  | RT, L <sub>C,int</sub>                                                                                                                                                                                                                                                                           | Parameter: L <sub>Aeq</sub><br>N. of students: 20            | Q2: ✓<br>Q3: ✓                                                                                   | FPF1: Physical education                             |
|                                                                                                                           | S5                                                                                                                  | RT, L <sub>amb</sub> , L <sub>Aeq</sub> out of the room                                                                                                                                                                                                                                          | Parameter: L <sub>Aeq</sub><br>N. of students: 15            | Q2: ✓                                                                                            |                                                      |
|                                                                                                                           | S6                                                                                                                  | RT                                                                                                                                                                                                                                                                                               | Parameter: L <sub>Aeq</sub><br>N. of students: 18            | Q2: ✓                                                                                            |                                                      |
|                                                                                                                           | S7                                                                                                                  | Outdoor L <sub>Aeq</sub>                                                                                                                                                                                                                                                                         | n/a <sup>3</sup>                                             | Q2: ✓<br>Q3: ✓                                                                                   |                                                      |
|                                                                                                                           | S1                                                                                                                  | RT, C <sub>50</sub> , STI, D <sub>nT,w</sub> (wall between the room and the corridor, wall between the room and adjacent classroom, floor between the room and the room below), L <sub>amb</sub> , L <sub>Aeq</sub> out of the room                                                              | Parameter: L <sub>Aeq</sub><br>N. of students: 18            | Q1: ✓<br>Q3: ✓                                                                                   | PPI1: Italian<br>PPM2: Mathematics                   |
|                                                                                                                           | S2                                                                                                                  | RT, C <sub>50</sub> , STI, D <sub>nT,w</sub> (wall between the room and the corridor, wall between the room and adjacent classroom, floor between the room and the room above), L' <sub>n</sub> (floor between the room and the room above), L <sub>amb</sub> , L <sub>Aeq</sub> out of the room | Parameter: L <sub>Aeq</sub><br>N. of students: 18            | Q2: ✓<br>Q3: ✓                                                                                   |                                                      |
|                                                                                                                           | S3                                                                                                                  | RT, C <sub>50</sub> , STI, D <sub>nT,w</sub> (wall between the room and the corridor, wall between the room and adjacent classroom, floor between the room and the room below), L <sub>amb</sub> , L <sub>Aeq</sub> out of the room                                                              | Parameter: L <sub>Aeq</sub><br>N. of students: 18            | Q2: ✓<br>Q3: ✓                                                                                   |                                                      |
|                                                                                                                           | S4                                                                                                                  | RT, L <sub>C,int</sub>                                                                                                                                                                                                                                                                           | Parameter: L <sub>Aeq</sub><br>N. of students: 18            | Q2: ✓<br>Q3: ✓                                                                                   | PPF3: Physical education<br>PPF4: Physical education |

| School<br>(K=Kindergarten,<br>P=Primary school, S=Secondary school)<br>/ City<br>(F=Florence, P=Perugia, R=Rome) | Investigated scenario<br>(S1=Classroom, S2=Laboratory, S3=Auditorium, S4=Gym, S5=Common area, S6=Canteen, S7=Outdoor area) | Investigation Protocol                                                                                                                                                                                                                                                |                                                              |                                                                                               |                                                                 |
|------------------------------------------------------------------------------------------------------------------|----------------------------------------------------------------------------------------------------------------------------|-----------------------------------------------------------------------------------------------------------------------------------------------------------------------------------------------------------------------------------------------------------------------|--------------------------------------------------------------|-----------------------------------------------------------------------------------------------|-----------------------------------------------------------------|
|                                                                                                                  |                                                                                                                            | Acoustic Measurements in Unoccupied Environments<br>(Parameters)                                                                                                                                                                                                      | Acoustic Measurements in Occupied Environments (Information) | Subjective Investigation Q1, Q2, Q3<br>(×= no questionnaires, ✓= administered questionnaires) | Vocal Effort<br>(Teacher code: Subject of teaching)             |
|                                                                                                                  | S5                                                                                                                         | RT, $L_{amb}$                                                                                                                                                                                                                                                         | Parameter: $L_{Aeq}$<br>N. of students: 3                    | Q2: ✓                                                                                         |                                                                 |
|                                                                                                                  | S6                                                                                                                         | n/a <sup>1</sup>                                                                                                                                                                                                                                                      | n/a <sup>1</sup>                                             | Q2: ✓                                                                                         |                                                                 |
|                                                                                                                  | S7                                                                                                                         | Outdoor $L_{Aeq}$                                                                                                                                                                                                                                                     | n/a <sup>3</sup>                                             | Q2: ✓<br>Q3: ✓                                                                                |                                                                 |
|                                                                                                                  |                                                                                                                            |                                                                                                                                                                                                                                                                       |                                                              |                                                                                               |                                                                 |
| P/R                                                                                                              | S1                                                                                                                         | RT, $C_{50}$ , $D_{nT,w}$ (wall between the room and the corridor, wall between the room and adjacent classroom, floor between the room and the room below), $L'_n$ (floor between the room and the room above), $L_{iC,int}$ , $L_{amb}$ , $L_{Aeq}$ out of the room | Parameter: $L_{Aeq}$<br>N. of students: 20                   | Q1: ✓<br>Q3: ✓                                                                                | RPI1: Italian<br>RPM2: Mathematics<br>RPS5: Educational support |
|                                                                                                                  | S2                                                                                                                         | n/a <sup>1</sup>                                                                                                                                                                                                                                                      | n/a <sup>1</sup>                                             | Q2: ✓<br>Q3: ✓                                                                                |                                                                 |
|                                                                                                                  | S3                                                                                                                         | n/a <sup>1</sup>                                                                                                                                                                                                                                                      | n/a <sup>1</sup>                                             | Q2: ✓<br>Q3: ✓                                                                                |                                                                 |
|                                                                                                                  | S4                                                                                                                         | RT, $L_{iC,int}$                                                                                                                                                                                                                                                      | n/a <sup>1</sup>                                             | Q2: ✓<br>Q3: ✓                                                                                | RPF3: Physical education<br>RPF4: Physical education            |
|                                                                                                                  | S5                                                                                                                         | RT, $L_{Aeq}$ out of the room                                                                                                                                                                                                                                         | Parameter: $L_{Aeq}$<br>N. of students: 13                   | Q2: ✓                                                                                         |                                                                 |
|                                                                                                                  | S6                                                                                                                         | n/a <sup>1</sup>                                                                                                                                                                                                                                                      | n/a <sup>1</sup>                                             | Q2: ✓                                                                                         |                                                                 |
|                                                                                                                  | S7                                                                                                                         | Outdoor $L_{Aeq}$                                                                                                                                                                                                                                                     | n/a <sup>3</sup>                                             | Q2: ✓<br>Q3: ✓                                                                                |                                                                 |
|                                                                                                                  |                                                                                                                            |                                                                                                                                                                                                                                                                       |                                                              |                                                                                               |                                                                 |
| S/F                                                                                                              | S1                                                                                                                         | RT, $C_{50}$ , $D_{nT,w}$ (wall between the room and the corridor, wall between the room and adjacent classroom, floor between the room and the room above), $L'_n$ (floor between the room and the room above), $L_{iC,int}$ , $L_{amb}$ , $L_{Aeq}$ out of the room | Parameter: $L_{Aeq}$<br>N. of students: 14                   | Q1: ✓<br>Q3: ✓                                                                                | FSI1: Italian<br>FSM1: Mathematics                              |
|                                                                                                                  | S2                                                                                                                         | RT, $C_{50}$ , $D_{nT,w}$ (wall between the room and the corridor, wall between the room and adjacent classroom), $L_{iC,int}$ , $L_{amb}$                                                                                                                            | Parameter: $L_{Aeq}$<br>N. of students: 24                   | Q2: ✓<br>Q3: ✓                                                                                |                                                                 |
|                                                                                                                  | S3                                                                                                                         | RT, STI, $D_{nT,w}$ (floor between the room and the room above), $L'_n$ (floor between the                                                                                                                                                                            | Parameter: $L_{Aeq}$<br>N. of students: 32                   | Q2: ✓<br>Q3: ✓                                                                                |                                                                 |

| School<br>(K=Kindergarten,<br>P=Primary school,<br>S=Secondary school)<br>/ City<br>(F=Florence,<br>P=Perugia,<br>R=Rome) | Investigated scenario                                                                                               | Investigation Protocol                                                                                                                                                                                                                                               |                                                              |                                                                                                  |                                                      |
|---------------------------------------------------------------------------------------------------------------------------|---------------------------------------------------------------------------------------------------------------------|----------------------------------------------------------------------------------------------------------------------------------------------------------------------------------------------------------------------------------------------------------------------|--------------------------------------------------------------|--------------------------------------------------------------------------------------------------|------------------------------------------------------|
|                                                                                                                           | (S1=Classroom,<br>S2=Laboratory,<br>S3=Auditorium,<br>S4=Gym,<br>S5=Common area,<br>S6=Canteen,<br>S7=Outdoor area) | Acoustic Measurements in Unoccupied Environments (Parameters)                                                                                                                                                                                                        | Acoustic Measurements in Occupied Environments (Information) | Subjective Investigation Q1, Q2, Q3<br>(×= no questionnaires,<br>✓= administered questionnaires) | Vocal Effort<br>(Teacher code: Subject of teaching)  |
| S/P                                                                                                                       |                                                                                                                     | room and the room above), $L_{IC,int}$ , $L_{amb}$ , $L_{Aeq}$ out of the room                                                                                                                                                                                       |                                                              |                                                                                                  |                                                      |
|                                                                                                                           | S4                                                                                                                  | $RT$ , $L_{IC,int}$                                                                                                                                                                                                                                                  | Parameter: $L_{Aeq}$<br>N. of students: 21                   | Q2: ✓<br>Q3: ✓                                                                                   | FSF1: Physical education<br>FSF2: Physical education |
|                                                                                                                           | S5                                                                                                                  | $RT$ , $L_{amb}$                                                                                                                                                                                                                                                     | n/a <sup>1</sup>                                             | Q2: ✓                                                                                            |                                                      |
|                                                                                                                           | S6                                                                                                                  | $RT$                                                                                                                                                                                                                                                                 | Parameter: $L_{Aeq}$<br>N. of students: 64                   | Q2: ✓                                                                                            |                                                      |
|                                                                                                                           | S7                                                                                                                  | Outdoor $L_{Aeq}$                                                                                                                                                                                                                                                    | n/a <sup>3</sup>                                             | Q2: ✓<br>Q3: ✓                                                                                   |                                                      |
|                                                                                                                           | S1                                                                                                                  | $RT$ , $STI$ , $C_{50}$ , $D_{nT,w}$ (wall between the room and the corridor, wall between the room and adjacent classroom, floor between the room and the room below), $L_{amb}$ , $L_{Aeq}$ out of the room                                                        | Parameter: $L_{Aeq}$<br>N. of students: 10                   | Q1: ✓<br>Q3: ✓                                                                                   | PSI1: Italian<br>PSM2: Mathematics                   |
|                                                                                                                           | S2                                                                                                                  | $RT$ , $STI$ , $C_{50}$ , $D_{nT,w}$ (wall between the room and the corridor, wall between the room and adjacent classroom, floor between the room and the room above), $L'_{nT}$ (floor between the room and the room above), $L_{amb}$ , $L_{Aeq}$ out of the room | Parameter: $L_{Aeq}$<br>N. of students: 10                   | Q2: ✓<br>Q3: ✓                                                                                   |                                                      |
|                                                                                                                           | S3                                                                                                                  | $RT$ , $STI$ , $C_{50}$ , $D_{nT,w}$ (wall between the room and the corridor, floor between the room and the room above), $L'_{nT}$ (floor between the room and the room above), $L_{amb}$ , $L_{Aeq}$ out of the room                                               | n/a <sup>1</sup>                                             | Q2: ✓<br>Q3: ✓                                                                                   |                                                      |
|                                                                                                                           | S4                                                                                                                  | $RT$ , $L_{amb}$                                                                                                                                                                                                                                                     | Parameter: $L_{Aeq}$<br>N. of students: 21                   | Q2: ✓<br>Q3: ✓                                                                                   | PSF3: Physical education<br>PSF4: Physical education |
|                                                                                                                           | S5                                                                                                                  | $RT$ , $L_{amb}$                                                                                                                                                                                                                                                     | Parameter: $L_{Aeq}$<br>N. of students: 3                    | Q2: ✓                                                                                            |                                                      |
|                                                                                                                           | S6                                                                                                                  | n/a <sup>1</sup>                                                                                                                                                                                                                                                     | n/a <sup>1</sup>                                             | Q2: ✓                                                                                            |                                                      |
|                                                                                                                           | S7                                                                                                                  | Outdoor $L_{Aeq}$                                                                                                                                                                                                                                                    | n/a <sup>3</sup>                                             | Q2: ✓                                                                                            |                                                      |

| School<br>(K=Kindergarten,<br>P=Primary school, S=Secondary school)<br>/ City<br>(F=Florence, P=Perugia, R=Rome) | Investigated scenario<br>(S1=Classroom, S2=Laboratory, S3=Auditorium, S4=Gym, S5=Common area, S6=Canteen, S7=Outdoor area) | Investigation Protocol                                                                                                                                                                                                                   |                                                                                               |                                                     |
|------------------------------------------------------------------------------------------------------------------|----------------------------------------------------------------------------------------------------------------------------|------------------------------------------------------------------------------------------------------------------------------------------------------------------------------------------------------------------------------------------|-----------------------------------------------------------------------------------------------|-----------------------------------------------------|
|                                                                                                                  | Acoustic Measurements in Unoccupied Environments (Parameters)                                                              | Acoustic Measurements in Occupied Environments (Information)                                                                                                                                                                             | Subjective Investigation Q1, Q2, Q3<br>(×= no questionnaires, √= administered questionnaires) | Vocal Effort<br>(Teacher code: Subject of teaching) |
| S/R                                                                                                              | S1                                                                                                                         | RT, $C_{50}$ , $D_{nT,w}$ (wall between the room and adjacent classroom, floor between the room and the room above), $L'_n$ (floor between the room and the room above), $L_{iC,int}$ , $L_{iD}$ , $L_{amb}$ , $L_{Aeq}$ out of the room | n/a <sup>1</sup>                                                                              | Q1: ×<br>Q3: ×                                      |
|                                                                                                                  | S2                                                                                                                         | RT, $C_{50}$ , $D_{nT,w}$ (wall between the room and adjacent classroom, floor between the room and the room above), $L_{amb}$ , $L_{Aeq}$ out of the room                                                                               | n/a <sup>1</sup>                                                                              | Q2: ×<br>Q3: ×                                      |
|                                                                                                                  | S3                                                                                                                         | n/a <sup>1</sup>                                                                                                                                                                                                                         | n/a <sup>1</sup>                                                                              | Q2: ×<br>Q3: ×                                      |
|                                                                                                                  | S4                                                                                                                         | RT, $L_{iC,int}$                                                                                                                                                                                                                         | n/a <sup>1</sup>                                                                              | Q2: ×<br>Q3: ×                                      |
|                                                                                                                  | S5                                                                                                                         | RT                                                                                                                                                                                                                                       | n/a <sup>1</sup>                                                                              | Q2: ×                                               |
|                                                                                                                  | S6                                                                                                                         | n/a <sup>1</sup>                                                                                                                                                                                                                         | n/a <sup>1</sup>                                                                              | Q2: ×                                               |
|                                                                                                                  | S7                                                                                                                         | n/a <sup>1</sup>                                                                                                                                                                                                                         | n/a <sup>3</sup>                                                                              | Q2: ×<br>Q3: ×                                      |

<sup>1</sup> This space has not been investigated (reasons: not existing in the school, not accessible or not used).

<sup>2</sup> Not applicable for children of kindergarten.

<sup>3</sup> Not pertinent for outdoor environments

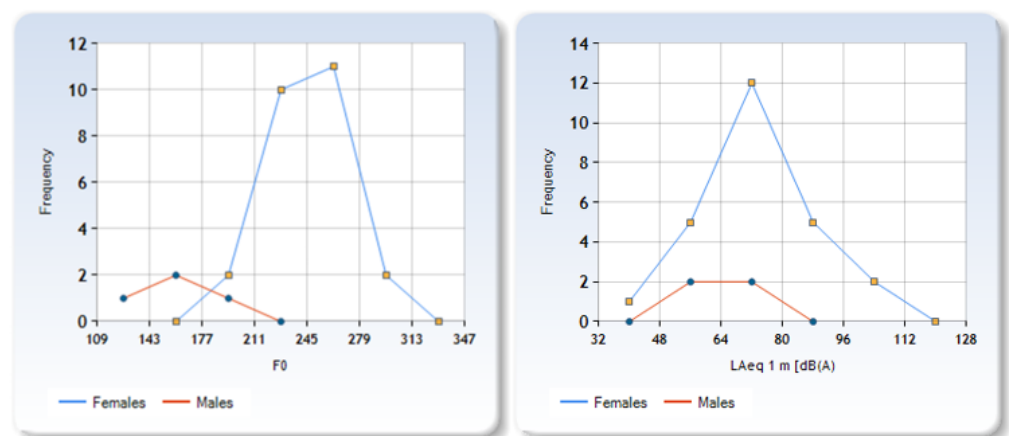

**Figure S1.** A histogram showing how the fundamental frequency is distributed (on the left). A histogram showing the distribution of the levels of the acoustic signal (SPL) emitted by the speaker at 1 m (vocal effort) (on the right).

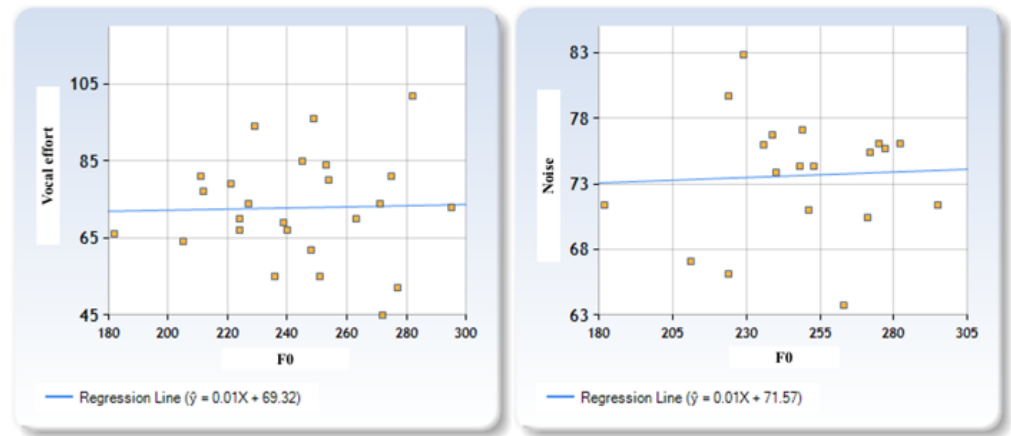

**Figure S2.** Scatter plots represent the linear regression between two variables. The relationship between F0 and Vocal Effort (on the left): linear regression  $x = \text{F0 [Hz]}$ ,  $y = \text{SPL voice [dB(A)]}$ ;  $r = 0.03$ ,  $p = 0.89$ . The relationship between F0 and Noise (on the right): linear regression  $x = \text{F0 [Hz]}$ ,  $y = \text{SPL noise [dB(A)]}$ ;  $r = 0.05$ ,  $p = 0.84$ .

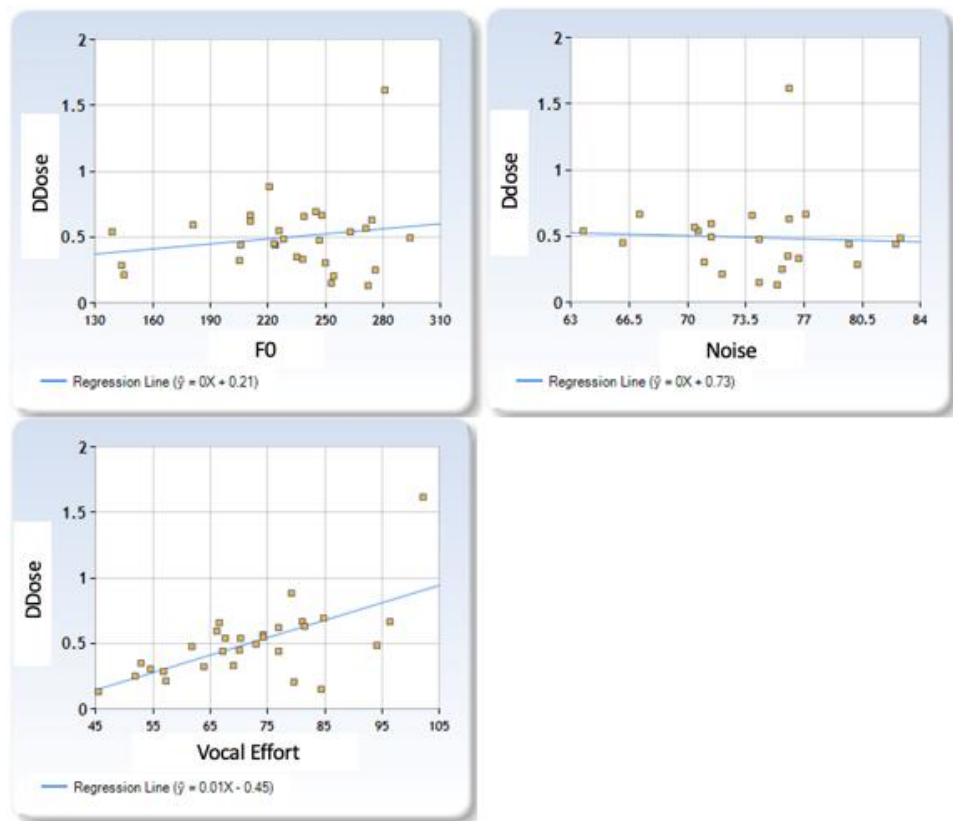

**Figure S3.** Scatter plots represent the linear regression between two variables. The relationship between F0 and DDose (top left): linear regression  $x = \text{F0 [Hz]}$ ,  $y = \text{DDose [m/s]}$ ;  $r = 0.05$ ,  $p = 0.81$ . The relationship between Noise and DDose (top right): linear regression  $x = \text{SPL noise [dB(A)]}$ ,  $y = \text{DDose [m/s]}$ ;  $r = -0.01$ ,  $p = 0.97$ . The relationship between Vocal effort and DDose (bottom left): linear regression  $x = \text{SPL voice [dB(A)]}$ ,  $y = \text{DDose [m/s]}$ ;  $r = 0.62$ ,  $p = 0.001$ .
